# Supplementary material
Source: Springer Nature journal article supplement (https://www.springermedizin.de/resource/supplementary/13229_2013_98_MOESM7_ESM.pdf/9676178)

**Cerebellum**

**Hippocampus**

**842**

**238**

**862**

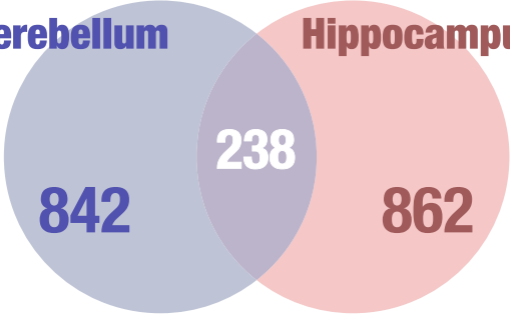

Supplement: MOESM7 [file 9676178]
